# Supplementary material for: Predicting the target landscape of kinase inhibitors using 3D convolutional neural networks
Source: PLoS Comput Biol. 2023 Sep 5;19(9):e1011301. doi: 10.1371/journal.pcbi.1011301 (PMC10508635; doi:10.1371/journal.pcbi.1011301)
Supplement: S9 Table — (XLSX) [file pcbi.1011301.s011.xlsx]

## Sheet: Table 9.
S9 Table. The balanced accuracies and F1 scores for the sparse and densely-covered test sets.
Balanced accuracy for sparse test set				Balanced accuracy for densely-covered test set
model 1	0.815924			model 1	0.570808
model 2	0.842381			model 2	0.576203
model 3	0.844849			model 3	0.567451
model 4	0.846431			model 4	0.566162
model 5	0.847172			model 5	0.567356
model 6	0.849692			model 6	0.573554
F1 score for sparse test set				F1 score for densely-covered test set
model 1	0.811813			model 1	0.127816
model 2	0.845757			model 2	0.147883
model 3	0.847523			model 3	0.200772
model 4	0.849637			model 4	0.21558
model 5	0.849917			model 5	0.221402
model 6	0.853336			model 6	0.229256
